# Supplementary material for: Green-light wavelength-selective organic solar cells for agrivoltaics: dependence of wavelength on photosynthetic rate
Source: Royal Society of Chemistry journal article supplement (doi:10.1039/d3fd00141e), 2023-09-19
Supplement: d3fd00141e1.pdf [file d3fd00141e1.pdf]

## Supplementary Information

### Green-light wavelength-selective organic solar cells for agrivoltaics: dependence of wavelength on photosynthetic rate

Seihou Jinnai,<sup>\*, a,b</sup> Naoto Shimohara,<sup>a</sup> Kazunori Ishikawa,<sup>a</sup> Kento Hama,<sup>c</sup> Yohei Iimuro,<sup>c</sup> Takashi Washio,<sup>a</sup> Yasuyuki Watanabe,<sup>\*, c</sup> and Yutaka Ie<sup>\*,a,b</sup>

<sup>a</sup> *The Institute of Scientific and Industrial Research (SANKEN), Osaka University, 8-1 Mihogaoka, Ibaraki, Osaka 567-0047, Japan*

<sup>b</sup> *Innovative Catalysis Science Division, Institute for Open and Transdisciplinary Research Initiatives (OTRI), Osaka University, 2-1 Yamadaoka, Suita, Osaka 565-0871, Japan*

<sup>c</sup> *Department of Mechanical and Electrical Engineering, Faculty of Engineering, Suwa University of Science, 5000-1 Toyohira, Chino, Nagano 391-0292, Japan*

#### Table of Contents

|                                                     |            |
|-----------------------------------------------------|------------|
| <b>Figures and tables</b>                           | <b>S02</b> |
| <b>Experimental information</b>                     | <b>S08</b> |
| <b>Preparation of materials</b>                     | <b>S08</b> |
| <b>NMR spectra</b>                                  | <b>S09</b> |
| <b>Script for Bayesian optimization</b>             | <b>S11</b> |
| <b>References</b>                                   | <b>S13</b> |
| <b>Density functional theory (DFT) calculations</b> | <b>S14</b> |

## Figures and tables

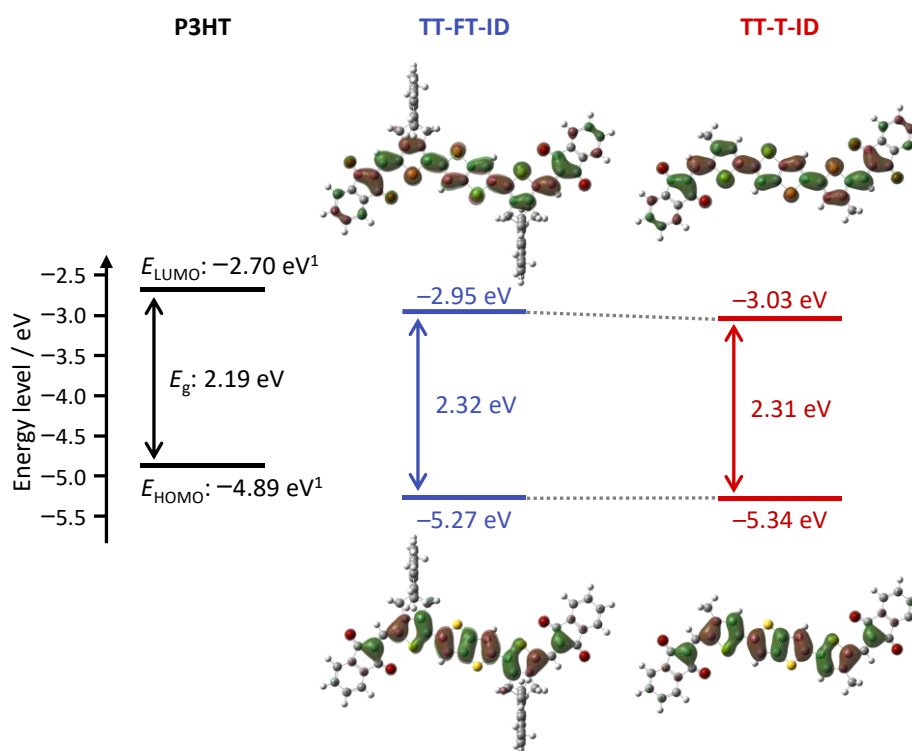

**Fig. S1** Energy levels and distribution of the frontier orbitals for **TT-FT-ID** and **TT-T-ID** along with the experimental energy levels of **P3HT**. All the alkyl groups for **TT-FT-ID** and **TT-T-ID** molecules were replaced with methyl groups to reduce the computational load.

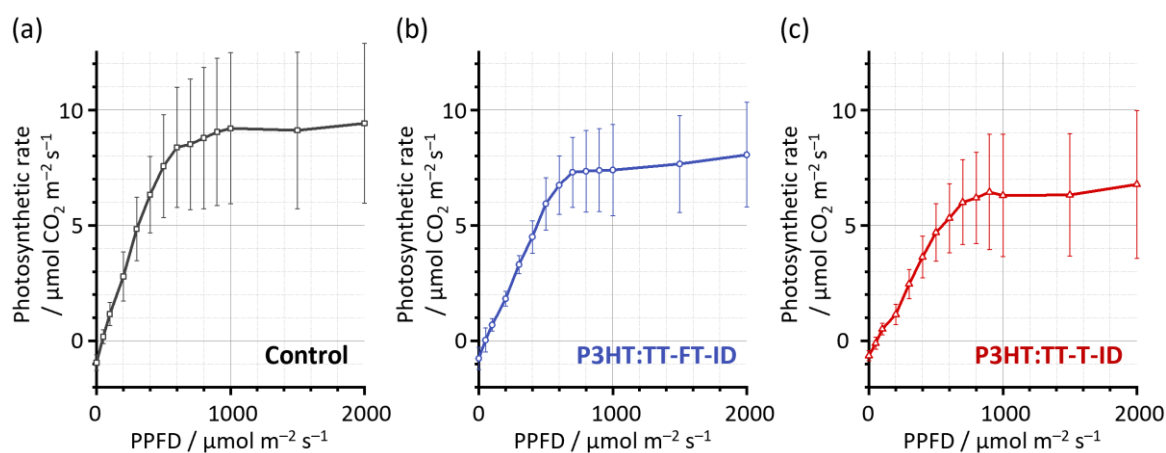

**Fig. R1** Photosynthetic rates for green pepper under (a) control conditions, (b) **P3HT:TT-FT-ID** blend film, and (c) **P3HT:TT-T-ID** blend film. Each point is the average of 4 measurements, and error bars indicate standard deviation. Experimental data for the above are given in Tables S9-11.

**Table S1** OSC characteristics of the P3HT:TT-FT-ID based devices.

| D:A <sup>a</sup> | solvent <sup>b</sup> | conc. <sup>c</sup> / mg mL <sup>-1</sup> | rotation / rpm | T <sub>a</sub> <sup>d</sup> / °C | PCE / %     | J <sub>sc</sub> / mAcm <sup>-2</sup> | V <sub>oc</sub> / V | FF / %    |
|------------------|----------------------|------------------------------------------|----------------|----------------------------------|-------------|--------------------------------------|---------------------|-----------|
| 1:1              | CB                   | 20                                       | 1000           | -                                | 0.95        | 3.29                                 | 0.86                | 34        |
| 1:1              | CB                   | 20                                       | 1000           | 130                              | 1.43        | 4.27                                 | 0.84                | 40        |
| 1:1              | DCB                  | 20                                       | 1000           | -                                | 1.57        | 3.61                                 | 0.90                | 48        |
| 1:1              | DCB                  | 20                                       | 1000           | 130                              | 1.26        | 3.39                                 | 0.86                | 43        |
| 1.5:1            | CB                   | 20                                       | 1000           | 130                              | 0.48        | 3.01                                 | 0.41                | 39        |
| 1:1.5            | CB                   | 20                                       | 1000           | 130                              | 0.40        | 2.36                                 | 0.53                | 32        |
| 2:1              | DCB                  | 20                                       | 1000           | -                                | 1.63        | 4.06                                 | 0.76                | 38        |
| <b>1.5:1</b>     | <b>DCB</b>           | <b>20</b>                                | <b>1000</b>    | -                                | <b>1.70</b> | <b>4.37</b>                          | <b>0.77</b>         | <b>50</b> |
| 1:1.5            | DCB                  | 20                                       | 1000           | -                                | 1.36        | 3.90                                 | 0.78                | 44        |

<sup>a</sup> Donor:acceptor weight ratio. <sup>b</sup> Process solvent (CB = chlorobenzene, DCB = 1,2-dichlorobenzene). <sup>c</sup> Concentration of total donor:acceptor weight. <sup>d</sup> Thermal annealing temperature in N<sub>2</sub> for 10 min.

**Table S2** OSC characteristics of the P3HT:TT-T-ID based devices.

| D:A <sup>a</sup> | solvent <sup>b</sup> | conc. <sup>c</sup> / mg mL <sup>-1</sup> | rotation / rpm | T <sub>a</sub> <sup>d</sup> / °C | PCE / %     | J <sub>sc</sub> / mAcm <sup>-2</sup> | V <sub>oc</sub> / V | FF / %    |
|------------------|----------------------|------------------------------------------|----------------|----------------------------------|-------------|--------------------------------------|---------------------|-----------|
| 1:1              | CB                   | 20                                       | 1000           | -                                | 0.14        | 0.50                                 | 0.78                | 36        |
| 1:1              | CB                   | 20                                       | 1000           | 130                              | 0.51        | 2.25                                 | 0.58                | 39        |
| 1:1              | DCB                  | 20                                       | 1000           | -                                | 0.42        | 1.37                                 | 0.81                | 38        |
| 1:1              | DCB                  | 20                                       | 1000           | 130                              | 0.52        | 2.25                                 | 0.51                | 45        |
| 2:1              | DCB                  | 20                                       | 1000           | -                                | 0.31        | 1.08                                 | 0.78                | 37        |
| <b>1.5:1</b>     | <b>DCB</b>           | <b>20</b>                                | <b>1000</b>    | -                                | <b>0.40</b> | <b>1.29</b>                          | <b>0.84</b>         | <b>37</b> |
| 1:1              | DCB                  | 20                                       | 1000           | -                                | 0.40        | 1.32                                 | 0.81                | 38        |
| 1:1.5            | DCB                  | 20                                       | 1000           | -                                | 0.31        | 1.10                                 | 0.77                | 37        |
| 1:2              | DCB                  | 20                                       | 1000           | -                                | insoluble   |                                      |                     |           |

<sup>a</sup> Donor:acceptor weight ratio. <sup>b</sup> Process solvent (CB = chlorobenzene, DCB = 1,2-dichlorobenzene). <sup>c</sup> Concentration of total donor:acceptor weight. <sup>d</sup> Thermal annealing temperature in N<sub>2</sub> for 10 min.

**Table S3** OSC characteristics of the P3HT:TT-FT-ID based devices.

| D:A <sup>a</sup> | solvent <sup>b</sup> | conc. <sup>c</sup> /mg mL <sup>-1</sup> | rotation / rpm | T <sub>a</sub> <sup>d</sup> / °C | PCE / % | J <sub>sc</sub> / mAcm <sup>-2</sup> | V <sub>oc</sub> / V | FF / % |
|------------------|----------------------|-----------------------------------------|----------------|----------------------------------|---------|--------------------------------------|---------------------|--------|
| 1.5:1            | DCB                  | 10                                      | 500            | -                                | 1.90    | 4.36                                 | 0.82                | 53     |
| 1.5:1            | DCB                  | 10                                      | 1000           | -                                | 1.25    | 3.11                                 | 0.74                | 54     |
| 1.5:1            | DCB                  | 20                                      | 1000           | -                                | 1.88    | 4.66                                 | 0.88                | 46     |
| 1.5:1            | DCB                  | 20                                      | 3000           | -                                | 1.49    | 3.75                                 | 0.80                | 50     |
| 1.5:1            | DCB                  | 30                                      | 1000           | -                                | 1.47    | 3.87                                 | 0.91                | 42     |
| 1.5:1            | DCB                  | 30                                      | 3000           | -                                | 1.93    | 4.49                                 | 0.90                | 48     |
| 1.5:1            | DCB                  | 40                                      | 2000           | -                                | 1.74    | 4.36                                 | 0.87                | 46     |
| 1.5:1            | DCB                  | 40                                      | 4000           | -                                | 1.16    | 3.33                                 | 0.84                | 41     |
| 1.5:1            | DCB                  | 10                                      | 5000           | -                                | 0.00    | -                                    | -                   | -      |
| 1.5:1            | DCB                  | 40                                      | 1000           | -                                | 0.00    | -                                    | -                   | -      |

<sup>a</sup> Donor:acceptor weight ratio. <sup>b</sup> Process solvent (CB = chlorobenzene, DCB = 1,2-dichlorobenzene). <sup>c</sup> Concentration of total donor:acceptor weight. <sup>d</sup> Thermal annealing temperature in N<sub>2</sub> for 10 min.

**Table S4** OSC characteristics of the P3HT:TT-T-ID based devices.

| D:A <sup>a</sup> | solvent <sup>b</sup> | conc. <sup>c</sup> /mg mL <sup>-1</sup> | rotation / rpm | T <sub>a</sub> <sup>d</sup> / °C | PCE / %   | J <sub>sc</sub> / mAcm <sup>-2</sup> | V <sub>oc</sub> / V | FF / % |
|------------------|----------------------|-----------------------------------------|----------------|----------------------------------|-----------|--------------------------------------|---------------------|--------|
| 1.5:1            | DCB                  | 5                                       | 500            | -                                | 0.00      | -                                    | -                   | -      |
| 1.5:1            | DCB                  | 5                                       | 1000           | -                                | 0.00      | -                                    | -                   | -      |
| 1.5:1            | DCB                  | 5                                       | 3000           | -                                | 0.00      | -                                    | -                   | -      |
| 1.5:1            | DCB                  | 5                                       | 5000           | -                                | 0.00      | -                                    | -                   | -      |
| 1.5:1            | DCB                  | 10                                      | 1000           | -                                | 0.02      | 0.99                                 | 0.09                | 27     |
| 1.5:1            | DCB                  | 10                                      | 3000           | -                                | 0.00      | -                                    | -                   | -      |
| 1.5:1            | DCB                  | 20                                      | 1000           | -                                | 0.40      | 1.29                                 | 0.84                | 37     |
| 1.5:1            | DCB                  | 20                                      | 3000           | -                                | 0.09      | 0.87                                 | 0.27                | 37     |
| 1.5:1            | DCB                  | 20                                      | 5000           | -                                | 0.06      | 0.76                                 | 0.24                | 35     |
| 1.5:1            | DCB                  | 30                                      | -              | -                                | insoluble |                                      |                     |        |

<sup>a</sup> Donor:acceptor weight ratio. <sup>b</sup> Process solvent (CB = chlorobenzene, DCB = 1,2-dichlorobenzene). <sup>c</sup> Concentration of total donor:acceptor weight. <sup>d</sup> Thermal annealing temperature in N<sub>2</sub> for 10 min.

**Table S5** OSC characteristics of the P3HT:TT-FT-ID based devices.

| conc. <sup>a</sup> /mg mL <sup>-1</sup> | rotation / rpm | predicted PCE <sup>b</sup> / % | PCE / %     | $J_{sc}$ / mAcm <sup>-2</sup> | $V_{oc}$ / V | FF / %    |
|-----------------------------------------|----------------|--------------------------------|-------------|-------------------------------|--------------|-----------|
| <b>28.3</b>                             | <b>2216</b>    | <b>1.96</b>                    | <b>2.04</b> | <b>5.93</b>                   | <b>0.80</b>  | <b>43</b> |
| 31.9                                    | 2457           | 1.98                           | 2.00        | 5.94                          | 0.79         | 43        |
| 17.6                                    | 500            | 2.11                           | 1.98        | 4.42                          | 0.86         | 52        |
| 40                                      | 2802           | 1.86                           | 1.31        | 4.00                          | 0.82         | 40        |

<sup>a</sup> Concentration of total donor:acceptor weight. <sup>b</sup> Predicted PCE by BO.

**Table S6** OSC characteristics of the P3HT:TT-T-ID based devices.

| conc. <sup>a</sup> /mg mL <sup>-1</sup> | rotation / rpm | predicted PCE <sup>b</sup> / % | PCE / % | $J_{sc}$ / mAcm <sup>-2</sup> | $V_{oc}$ / V | FF / % |
|-----------------------------------------|----------------|--------------------------------|---------|-------------------------------|--------------|--------|
| 20.0                                    | 500            | 0.41                           | 0.03    | 0.75                          | 0.14         | 29     |
| 18.7                                    | 626            | 0.38                           | 0.00    | -                             | -            | -      |
| 20.0                                    | 698            | 0.41                           | 0.00    | -                             | -            | -      |
| 20.0                                    | 627            | 0.41                           | 0.18    | 0.99                          | 0.41         | 44     |

<sup>a</sup> Concentration of total donor:acceptor weight. <sup>b</sup> Predicted PCE by BO.

**Table S7** OSC characteristics of the optimized P3HT:TT-FT-ID based devices.

| Run      | PCE / %     | $J_{sc}$ / mAcm <sup>-2</sup> | $V_{oc}$ / V | FF / %    |
|----------|-------------|-------------------------------|--------------|-----------|
| 1        | 2.04        | 5.93                          | 0.80         | 43        |
| 2        | 2.12        | 6.50                          | 0.76         | 43        |
| <b>3</b> | <b>2.43</b> | <b>5.83</b>                   | <b>0.78</b>  | <b>53</b> |
| 4        | 2.37        | 5.77                          | 0.78         | 52        |
| 5        | 1.80        | 4.49                          | 0.77         | 52        |
| average  | 2.15 ± 0.26 | 5.70 ± 0.74                   | 0.78 ± 0.01  | 49 ± 5    |

**Table S8** OSC characteristics of the optimized P3HT:TT-T-ID based devices.

| Run      | PCE / %     | $J_{sc}$ / mAcm <sup>-2</sup> | $V_{oc}$ / V | FF / %    |
|----------|-------------|-------------------------------|--------------|-----------|
| 1        | 0.40        | 1.29                          | 0.84         | 37        |
| 2        | 0.40        | 1.38                          | 0.71         | 40        |
| 3        | 0.40        | 1.39                          | 0.71         | 40        |
| <b>4</b> | <b>0.55</b> | <b>1.78</b>                   | <b>0.79</b>  | <b>39</b> |
| 5        | 0.24        | 1.04                          | 0.67         | 35        |
| average  | 0.40 ± 0.11 | 1.38 ± 0.27                   | 0.74 ± 0.07  | 38 ± 2    |

**Table S9** The photosynthetic rate for green pepper under control conditions.

| PPFD <sup>a</sup><br>/ $\mu\text{mol m}^{-2} \text{s}^{-1}$ | Photosynthetic rate<br>/ $\mu\text{mol CO}_2 \text{ m}^{-2} \text{ s}^{-1}$ | Photosynthetic rate<br>/ $\mu\text{mol CO}_2 \text{ m}^{-2} \text{ s}^{-1}$ | Photosynthetic rate<br>/ $\mu\text{mol CO}_2 \text{ m}^{-2} \text{ s}^{-1}$ | Photosynthetic rate<br>/ $\mu\text{mol CO}_2 \text{ m}^{-2} \text{ s}^{-1}$ | Photosynthetic rate<br>/ $\mu\text{mol CO}_2 \text{ m}^{-2} \text{ s}^{-1}$ |
|-------------------------------------------------------------|-----------------------------------------------------------------------------|-----------------------------------------------------------------------------|-----------------------------------------------------------------------------|-----------------------------------------------------------------------------|-----------------------------------------------------------------------------|
|                                                             | Batch 1                                                                     | Batch 2                                                                     | Batch 3                                                                     | Batch 4                                                                     | Average                                                                     |
| 0                                                           | -1.231704896                                                                | -1.042989088                                                                | -0.348542991                                                                | -1.139159675                                                                | -0.940599163                                                                |
| 50                                                          | 0.200240669                                                                 | -0.006474152                                                                | 0.64832943                                                                  | -0.113694337                                                                | 0.182100402                                                                 |
| 100                                                         | 1.551144127                                                                 | 0.795560608                                                                 | 1.746363388                                                                 | 0.558814924                                                                 | 1.162970762                                                                 |
| 200                                                         | 3.585932386                                                                 | 2.414174984                                                                 | 3.929976562                                                                 | 1.222454564                                                                 | 2.788134624                                                                 |
| 300                                                         | 6.046457589                                                                 | 4.232693082                                                                 | 6.218539603                                                                 | 2.887496489                                                                 | 4.846296691                                                                 |
| 400                                                         | 8.423985235                                                                 | 6.00390737                                                                  | 6.992365688                                                                 | 3.876391829                                                                 | 6.324162531                                                                 |
| 500                                                         | 10.43899555                                                                 | 7.732516624                                                                 | 7.879711664                                                                 | 4.197258981                                                                 | 7.562120705                                                                 |
| 600                                                         | 11.58580741                                                                 | 8.920801644                                                                 | 8.644713495                                                                 | 4.345319796                                                                 | 8.374160585                                                                 |
| 700                                                         | 11.98170159                                                                 | 8.364336925                                                                 | 9.515883687                                                                 | 4.17518948                                                                  | 8.509277921                                                                 |
| 800                                                         | 12.55597955                                                                 | 8.613533769                                                                 | 9.860548115                                                                 | 4.085974635                                                                 | 8.779009017                                                                 |
| 900                                                         | 13.11503561                                                                 | 8.928202224                                                                 | 9.909685885                                                                 | 4.219497107                                                                 | 9.043105207                                                                 |
| 1000                                                        | 13.23457186                                                                 | 9.27297488                                                                  | 10.15425693                                                                 | 4.139898395                                                                 | 9.200425515                                                                 |
| 1500                                                        | 13.39292236                                                                 | 8.833746055                                                                 | 10.24816607                                                                 | 3.981990233                                                                 | 9.114206179                                                                 |
| 2000                                                        | 13.73297193                                                                 | 9.498898918                                                                 | 10.33783577                                                                 | 4.096212009                                                                 | 9.416479657                                                                 |

<sup>a</sup> Photosynthetic photon flux density.**Table S10** Photosynthetic rate for green pepper using the P3HT:TT-FT-ID blend film.

| PPFD <sup>a</sup><br>/ $\mu\text{mol m}^{-2} \text{ s}^{-1}$ | Photosynthetic rate<br>/ $\mu\text{mol CO}_2 \text{ m}^{-2} \text{ s}^{-1}$ | Photosynthetic rate<br>/ $\mu\text{mol CO}_2 \text{ m}^{-2} \text{ s}^{-1}$ | Photosynthetic rate<br>/ $\mu\text{mol CO}_2 \text{ m}^{-2} \text{ s}^{-1}$ | Photosynthetic rate<br>/ $\mu\text{mol CO}_2 \text{ m}^{-2} \text{ s}^{-1}$ | Photosynthetic rate<br>/ $\mu\text{mol CO}_2 \text{ m}^{-2} \text{ s}^{-1}$ |
|--------------------------------------------------------------|-----------------------------------------------------------------------------|-----------------------------------------------------------------------------|-----------------------------------------------------------------------------|-----------------------------------------------------------------------------|-----------------------------------------------------------------------------|
|                                                              | Batch 1                                                                     | Batch 2                                                                     | Batch 3                                                                     | Batch 4                                                                     | Average                                                                     |
| 0                                                            | -1.441779833                                                                | -0.484825183                                                                | -0.948308864                                                                | -0.155683978                                                                | -0.757649465                                                                |
| 50                                                           | -0.681074821                                                                | 0.561408457                                                                 | -0.232507033                                                                | 0.500535347                                                                 | 0.037090488                                                                 |
| 100                                                          | 0.274030794                                                                 | 1.013752031                                                                 | 0.708579314                                                                 | 0.769885196                                                                 | 0.691561834                                                                 |
| 200                                                          | 1.754820634                                                                 | 2.277511971                                                                 | 1.880839327                                                                 | 1.387959967                                                                 | 1.825282975                                                                 |
| 300                                                          | 3.330612199                                                                 | 3.929076491                                                                 | 3.019201869                                                                 | 2.936085169                                                                 | 3.303743932                                                                 |
| 400                                                          | 4.67770562                                                                  | 5.561807291                                                                 | 4.047052587                                                                 | 3.715638547                                                                 | 4.500551011                                                                 |
| 500                                                          | 6.87891455                                                                  | 7.183515527                                                                 | 5.174760831                                                                 | 4.500529224                                                                 | 5.934430033                                                                 |
| 600                                                          | 7.684811606                                                                 | 8.229880197                                                                 | 5.922756165                                                                 | 5.142438632                                                                 | 6.74497165                                                                  |
| 700                                                          | 8.856360744                                                                 | 8.650512459                                                                 | 6.443909534                                                                 | 5.249705052                                                                 | 7.300121947                                                                 |
| 800                                                          | 9.090074924                                                                 | 9.088193863                                                                 | 5.92797715                                                                  | 5.274381027                                                                 | 7.345156741                                                                 |
| 900                                                          | 9.020536583                                                                 | 9.302233847                                                                 | 5.912020063                                                                 | 5.309574786                                                                 | 7.38609132                                                                  |
| 1000                                                         | 8.92505013                                                                  | 9.725731265                                                                 | 5.770586413                                                                 | 5.144683335                                                                 | 7.391512785                                                                 |
| 1500                                                         | 9.525438576                                                                 | 9.93792437                                                                  | 6.019447874                                                                 | 5.148891028                                                                 | 7.657925462                                                                 |
| 2000                                                         | 9.682972693                                                                 | 10.84754744                                                                 | 6.26107672                                                                  | 5.433171203                                                                 | 8.056192015                                                                 |

<sup>a</sup> Photosynthetic photon flux density.

**Table S11** Photosynthetic rate for green pepper using the P3HT:TT-T-ID blend film.

| PPFD <sup>a</sup><br>/ $\mu\text{mol m}^{-2} \text{s}^{-1}$ | Photosynthetic rate                                  |
|-------------------------------------------------------------|------------------------------------------------------|------------------------------------------------------|------------------------------------------------------|------------------------------------------------------|------------------------------------------------------|
|                                                             | / $\mu\text{mol CO}_2 \text{ m}^{-2} \text{ s}^{-1}$ |
|                                                             | Batch 1                                              | Batch 2                                              | Batch 3                                              | Batch 4                                              | Average                                              |
| 0                                                           | -0.671871224                                         | -0.735713658                                         | -0.280411328                                         | -0.863309956                                         | -0.637826542                                         |
| 50                                                          | 0.173048389                                          | -0.508836828                                         | 0.036913232                                          | -0.115170446                                         | -0.103511413                                         |
| 100                                                         | 0.828800456                                          | 0.620464945                                          | 0.473160557                                          | 0.128759401                                          | 0.51279634                                           |
| 200                                                         | 1.691448507                                          | 1.458086846                                          | 0.752130743                                          | 0.690185871                                          | 1.147962992                                          |
| 300                                                         | 3.402649227                                          | 2.649288874                                          | 1.935223702                                          | 1.852153682                                          | 2.459828871                                          |
| 400                                                         | 4.902039106                                          | 4.005606882                                          | 3.049924085                                          | 2.555251271                                          | 3.628205336                                          |
| 500                                                         | 6.389930447                                          | 5.159029797                                          | 4.258492209                                          | 2.970082161                                          | 4.694383654                                          |
| 600                                                         | 7.297440488                                          | 5.994199582                                          | 4.66187171                                           | 3.290101891                                          | 5.310903418                                          |
| 700                                                         | 8.617089643                                          | 6.649392732                                          | 5.004452571                                          | 3.719376106                                          | 5.997577763                                          |
| 800                                                         | 8.882130175                                          | 6.897620445                                          | 5.509407984                                          | 3.485352416                                          | 6.193627755                                          |
| 900                                                         | 10.21655004                                          | 6.736112897                                          | 5.476994822                                          | 3.344908589                                          | 6.443641588                                          |
| 1000                                                        | 10.37061769                                          | 6.361857316                                          | 5.410536084                                          | 3.023832968                                          | 6.291711015                                          |
| 1500                                                        | 10.2636043                                           | 6.652594886                                          | 5.457905169                                          | 2.905544377                                          | 6.319912182                                          |
| 2000                                                        | 11.64075462                                          | 7.012521149                                          | 5.689293656                                          | 2.7479617                                            | 6.772632781                                          |

<sup>a</sup> Photosynthetic photon flux density.

## Experimental information

Column chromatography was performed on silica gel, KANTO Chemical silica gel 60N (40–50  $\mu\text{m}$ ). Thin-layer chromatography plates were visualized by exposure to UV light.  $^1\text{H}$  and  $^{13}\text{C}$  NMR spectra were recorded on a JEOL ECS-400 spectrometer. Data are reported as follows: chemical shift in ppm ( $\delta$ ), multiplicity (s = singlet, d = doublet, t = triplet, m = multiplet, br = broad), coupling constant (Hz). Mass spectra were obtained on a Shimadzu AXIMA-TOF system. UV-vis spectra were recorded on a Shimadzu UV-3600 spectrophotometer. Photoelectron yield spectroscopy (PYS) was performed using a Bunkoukeiki BIP-KV202GD instrument. Low-energy inverse photoemission spectroscopy (LEIPS) was performed by Ulvac-Phi, Inc. LEIPS system. The surface structures of the deposited organic films were observed by atomic force microscopy (AFM) (Shimadzu, SPM9600). Elemental analysis was performed on a Perkin Elmer LS-50B instrument by the Elemental Analysis Section of Comprehensive Analysis Center (CAC), SANKEN, Osaka University.

## Preparation of materials.

Commercially available reagents were used without further purification. All reactions were carried out under a nitrogen atmosphere. **1** and **2** was prepared by our previously reported procedure.<sup>2</sup>

*Synthesis of TT-FT-ID:* Piperidine (100  $\mu\text{L}$ ) was added to solution of **1** (65 mg, 0.055 mmol) and 1,3-indanone (64 mg, 0.44 mmol) in  $\text{CHCl}_3$  (5 mL) and the resulting mixture was stirred at 65  $^\circ\text{C}$  for 12 h. Methanol (10 mL) was added to the reaction mixture and the resulting precipitate was collected on a filter. The crude product was purified by column chromatography on silica gel (hexane/ $\text{CHCl}_3$ =2/1, v/v,  $R_f$  = 0.3), followed by further purification with reprecipitation using  $\text{CHCl}_3$  and acetone to give TT-FT-ID (61 mg, 77%). Deep purple solid.  $^1\text{H}$  NMR (400 MHz, TMS)  $\delta$ : 7.98 (m, 2H), 7.93 (m, 2H), 7.83 (s, 2H), 7.77 (m, 4H), 7.61 (s, 2H), 7.59 (d,  $J$  = 8.0 Hz, 2H), 7.59 (d,  $J$  = 8.0 Hz, 4H), 7.14 (d,  $J$  = 8.0 Hz, 4H), 7.06 (s, 4H), 3.45 (d,  $J$  = 16.4 Hz, 8H), 2.52 (d,  $J$  = 7.2 Hz, 8H), 1.52 (m, 4H), 1.35-1.14 (br, 32H), 0.80 (m, 24H).  $^{13}\text{C}$  NMR (100 MHz, TMS)  $\delta$ : 190.13, 189.97, 164.01, 151.15, 144.13, 142.06, 141.83, 141.57, 140.55, 139.76, 139.64, 137.10, 134.94, 134.77, 133.32, 133.29, 128.90, 127.14, 123.06, 122.92, 122.77, 119.34, 118.61, 62.07, 41.86, 41.15, 40.75, 40.24, 32.26, 28.79, 25.46, 23.05, 14.14, 10.83. MS  $m/z$  calcd. for  $\text{C}_{96}\text{H}_{100}\text{O}_4\text{S}_4$  ( $\text{M}^-$ ): 1446; found: 1446. Anal. calcd for  $\text{C}_{96}\text{H}_{100}\text{O}_4\text{S}_4$ : C 79.74, H 6.97; found: C 79.57, H 6.99.

*Synthesis of TT-T-ID:* Compound **TT-T-ID** was synthesized from **2** (60 mg, 0.103 mmol) by following the procedure used for the preparation of **TT-FT-ID**. Yield: 51 mg (60%). Deep purple solid.  $^1\text{H}$  NMR (400 MHz, TMS)  $\delta$ : 8.00-7.97 (m, 4H), 7.91 (s, 2H), 7.80-7.78 (m, 4H), 7.59 (s, 2H), 2.84 (d,  $J$  = 7.2 Hz, 4H), 1.76 (m, 2H), 1.41-1.26 (br, 16H), 0.90 (m, 12H).  $^{13}\text{C}$  NMR (100 MHz, TMS) showed no distinct peaks due to its limited solubility in  $\text{CDCl}_3$ . MS  $m/z$  calcd. for  $\text{C}_{50}\text{H}_{48}\text{O}_4\text{S}_4$  ( $\text{M}^-$ ): 841; found: 841. Anal. calcd for  $\text{C}_{50}\text{H}_{48}\text{O}_4\text{S}_4$ : C 71.39, H 5.75; found: C 71.19, H 5.78.



# NMR Spectra

## <sup>1</sup>H NMR spectrum of TT-FT-ID

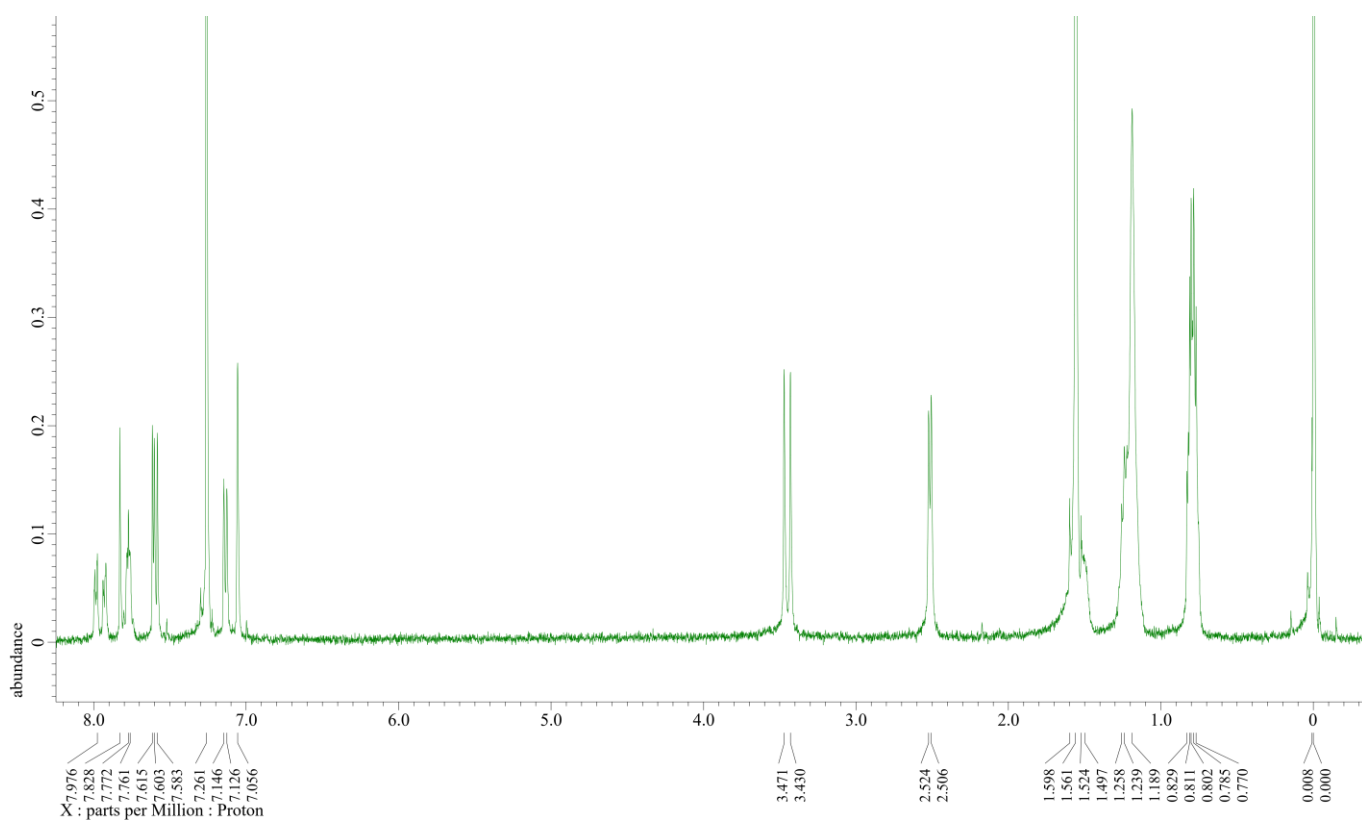

## <sup>13</sup>C NMR spectrum of TT-FT-ID

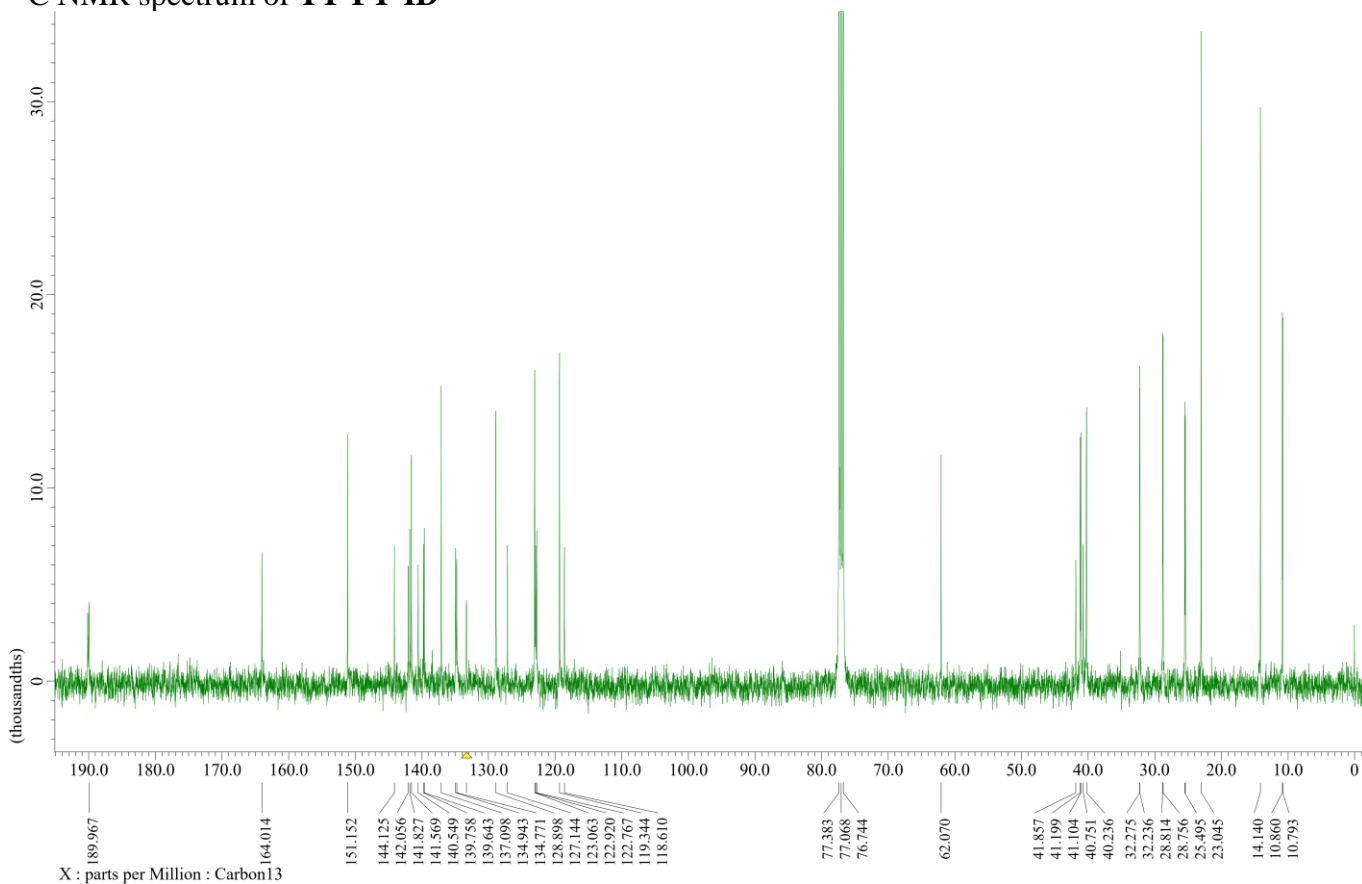

# $^1\text{H}$ NMR spectrum of TT-T-ID

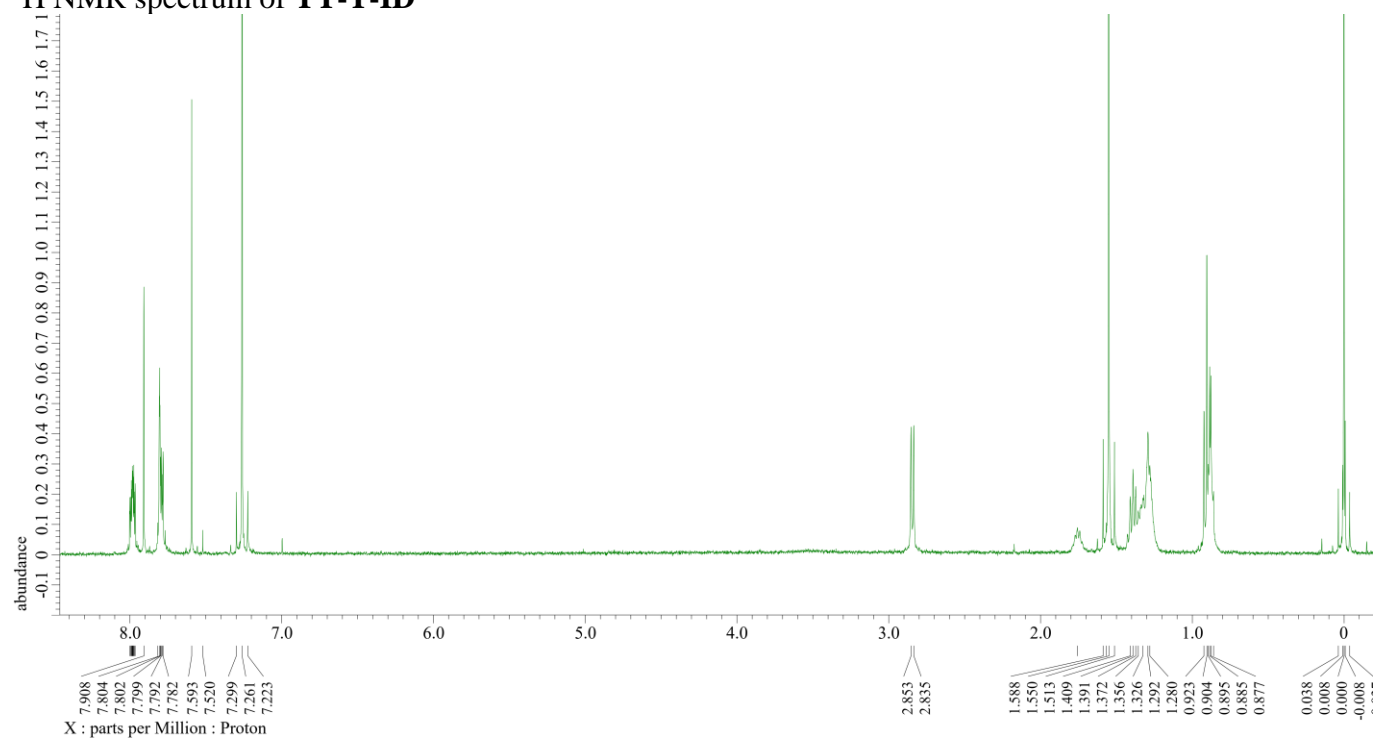

## Script for Bayesian optimization

Bayesian optimizations were performed for the experimental data (Table S3 and S4) based on the following Python script.

```
import numpy as np
import pandas as pd
import GPy
import GPyOpt
import datetime

# Prediction number
batch_size = 4

# Display GPR results (only for num_x=2): True/False
gpr_output = False

# Data file loading. File name: data.csv
data = pd.read_csv("data.csv")

# Experimental data storing
x_results = data.iloc[:,1:] # Conditions
y_results = data.iloc[:,0] # Power conversion efficiency

# Number of experimental variables
num_x = len(data.columns)-1

# Variables for GPR
norm_x_suggest = []
y_predict = []
y_mean = []
y_variance = []

# List XY data
x_data = np.asarray(x_results).astype(float)
y_data = np.asarray(y_results)
y_data = y_data.reshape(len(y_data),1)
y_data = -y_data

# Standardization of Conditions (x_results) : Min-Max standardization
# x0:Concentration, x1:Rotational speed.
norm_x_data = x_data
norm_x_data[:,0] = norm_x_data[:,0] / 40 # Scale 0-40 mg/mL to 0-1
norm_x_data[:,1] = norm_x_data[:,1] / 5000 # Scale 0-5000 rpm to 0-1

# Range of experimental conditions
bounds = [{'name': 'x1', 'type': 'continuous', 'domain': (0.1, 1)},
          {'name': 'x2', 'type': 'continuous', 'domain': (0.1, 1)},
          ]

print("GPR started for {} batches".format(batch_size))

for i in range(batch_size):

    # Parameter for GPR
    params = {'acquisition_type':'LCB',
              'kernel':GPy.kern.Matern52(input_dim=len(bounds)), # Define the dimension of input by bounds
              'f':None,
              'domain':bounds,
              'X':norm_x_data,
              'Y':y_data,
              'normalize_Y': False,
              'acquisition_weight': 2,
```

|   | A    | B  | C    |  |
|---|------|----|------|--|
| 1 | y    | x0 | x1   |  |
| 2 | 1.9  | 10 | 500  |  |
| 3 | 1.25 | 10 | 1000 |  |
| 4 | 1.88 | 20 | 1000 |  |
| 5 | 1.49 | 20 | 3000 |  |
| 6 | 1.47 | 30 | 1000 |  |
| 7 | 1.93 | 30 | 3000 |  |
|   | ⋮    | ⋮  | ⋮    |  |

Example for "data.csv"

```

}

# Execution of GPR
b_opt = GPyOpt.methods.BayesianOptimization(**params)

norm_x_suggest.append(b_opt.suggest_next_locations(ignored_X = norm_x_data))
y_predict.append(b_opt.model.model.predict(norm_x_suggest[i]))

norm_x_data = np.append(norm_x_data, norm_x_suggest[i], axis=0)
y_data = np.append(y_data, y_predict[i][0], axis=0)

# Separation of mean values and variance values
y_mean.append(y_predict[i][0])
y_variance.append(y_predict[i][1])

# Show/Save GPR results
if gpr_output == True:
    b_opt.plot_acquisition()
else:
    date = str(datetime.date.today())
    batch = str(i + 1)
    filename = date + '_' + batch
    b_opt.plot_acquisition(filename)

print('GPR for batch: {} completed'.format(i+1))

# Output of prediction
print("\nNext {} experiment conditions are as follow:".format(batch_size))
for i in range(batch_size):
    print("\nCondition for batch {}".format(i+1))
    print("Concentration [variable 1]: {:.1f} mg/mL".format(norm_x_suggest[i][0][0] * 40))
    print("Rotational speed [variable 2]: {:.0f} rpm".format(norm_x_suggest[i][0][1] * 5000))
    print("Predicted PCE (mean): {:.2f}%".format(-y_mean[i][0][0]))
    print("Variance: {:.3f}%".format(y_variance[i][0][0]))

```

## References

- 1 S. Jinnai, Y. Ie, M. Karakawa, T. Aernouts, Y. Nakajima, S. Mori, and Y. Aso, *Chem. Mater.* **2016**, *28*, 1705–1713.
- 2 S. Jinnai, K. Murayama, K. Nagai, M. Mineshita, K. Kato, A. Muraoka, A. Yamakata, S. Saeki, Y. Kobori, and Y. Ie, *J. Mater. Chem. A* **2022**, *10*, 20035–20047.

## Density functional theory (DFT) calculations

All calculations were conducted using the Gaussian 16 program. The geometry was optimized with the Becke Hybrid (B3LYP) at 6-31G(d,p) level. All of the alkyl groups were replaced with methyl groups to reduce the computational load.

### Optimized structure of TT-FT-ID

| Center Number | Atomic Number | Atomic Type | Coordinates (Angstroms) |           |           |
|---------------|---------------|-------------|-------------------------|-----------|-----------|
|               |               |             | X                       | Y         | Z         |
| 1             | 6             | 0           | 2.089349                | 0.102024  | 0.148954  |
| 2             | 6             | 0           | 3.434214                | 0.185604  | 0.227746  |
| 3             | 6             | 0           | 4.335984                | -0.788011 | 0.403500  |
| 4             | 16            | 0           | 4.175467                | 1.457824  | 0.132198  |
| 5             | 6             | 0           | 5.574942                | 1.040406  | 0.272535  |
| 6             | 6             | 0           | 5.567575                | -0.288415 | 0.435428  |
| 7             | 6             | 0           | 6.707321                | 1.767596  | 0.255220  |
| 8             | 6             | 0           | 7.021719                | 3.072898  | 0.101791  |
| 9             | 6             | 0           | 8.332846                | 3.469140  | 0.140848  |
| 10            | 6             | 0           | 8.314612                | 4.809057  | -0.043704 |
| 11            | 6             | 0           | 7.054434                | 5.216159  | -0.188964 |
| 12            | 6             | 0           | 6.211468                | 4.156976  | -0.104275 |
| 13            | 6             | 0           | 9.344547                | 5.663624  | -0.087870 |
| 14            | 6             | 0           | 9.058022                | 6.962492  | -0.286324 |
| 15            | 6             | 0           | 7.786028                | 7.377655  | -0.434000 |
| 16            | 6             | 0           | 6.760715                | 6.508374  | -0.387092 |
| 17            | 8             | 0           | 9.331144                | 2.799312  | 0.303033  |
| 18            | 6             | 0           | -6.192364               | -4.130043 | -0.366857 |
| 19            | 6             | 0           | 6.631616                | -1.324755 | 0.629918  |
| 20            | 6             | 0           | 5.801575                | -2.601951 | 0.364206  |
| 21            | 6             | 0           | 4.302725                | -2.277289 | 0.571410  |
| 22            | 6             | 0           | 6.059312                | -3.144039 | -1.030121 |
| 23            | 6             | 0           | 6.570241                | -4.385116 | -1.024770 |
| 24            | 6             | 0           | 6.711136                | -4.802511 | 0.241928  |
| 25            | 6             | 0           | 6.292728                | -3.839187 | 1.077140  |
| 26            | 6             | 0           | 7.178024                | -5.962703 | 0.722643  |
| 27            | 6             | 0           | 7.218019                | -6.139484 | 2.053716  |
| 28            | 6             | 0           | 6.801388                | -5.183006 | 2.905372  |
| 29            | 6             | 0           | 6.335629                | -4.024216 | 2.404228  |
| 30            | 6             | 0           | 5.826996                | -2.513531 | -2.190319 |
| 31            | 6             | 0           | 6.105809                | -3.124447 | -3.356296 |
| 32            | 6             | 0           | 6.619081                | -4.369285 | -3.333307 |
| 33            | 6             | 0           | 6.855174                | -5.008956 | -2.175620 |
| 34            | 6             | 0           | 6.862853                | -5.421131 | 4.395788  |
| 35            | 6             | 0           | 5.841866                | -2.407097 | -4.659336 |
| 36            | 16            | 0           | 1.350145                | -1.179982 | 0.228777  |
| 37            | 6             | 0           | 0.007273                | -0.632703 | 0.074846  |
| 38            | 6             | 0           | -0.009637               | 0.690501  | -0.043670 |
| 39            | 6             | 0           | 1.243330                | 1.144911  | -0.004618 |
| 40            | 6             | 0           | -1.243905               | -1.089236 | 0.010850  |
| 41            | 6             | 0           | -2.089549               | -0.046227 | -0.142134 |
| 42            | 16            | 0           | -1.353281               | 1.239403  | -0.184379 |
| 43            | 6             | 0           | -3.432534               | -0.131003 | -0.247946 |
| 44            | 6             | 0           | -4.336352               | 0.849831  | -0.361115 |
| 45            | 16            | 0           | -4.170212               | -1.409016 | -0.250414 |
| 46            | 6             | 0           | -5.566884               | -0.988055 | -0.409381 |
| 47            | 6             | 0           | -5.564751               | 0.349914  | -0.454867 |
| 48            | 6             | 0           | -6.693453               | -1.718490 | -0.500577 |
| 49            | 6             | 0           | -7.002997               | -3.033669 | -0.488967 |
| 50            | 6             | 0           | -8.308972               | -3.428766 | -0.614951 |
| 51            | 6             | 0           | -8.286936               | -4.780509 | -0.570389 |
| 52            | 6             | 0           | -7.029724               | -5.195600 | -0.423016 |
| 53            | 8             | 0           | -4.994715               | -4.252456 | -0.234538 |
| 54            | 6             | 0           | -9.311452               | -5.638747 | -0.653087 |
| 55            | 6             | 0           | -9.022288               | -6.950121 | -0.581881 |
| 56            | 6             | 0           | -7.753268               | -7.373799 | -0.433085 |
| 57            | 6             | 0           | -6.733666               | -6.500442 | -0.350557 |
| 58            | 8             | 0           | -9.305992               | -2.749486 | -0.742664 |
| 59            | 8             | 0           | 5.010611                | 4.274907  | -0.207492 |
| 60            | 6             | 0           | -6.629027               | 1.397822  | -0.574645 |
| 61            | 6             | 0           | -5.811742               | 2.634718  | -0.135124 |
| 62            | 6             | 0           | -4.312272               | 2.348653  | -0.389469 |
| 63            | 6             | 0           | -6.312096               | 3.957119  | -0.663714 |
| 64            | 6             | 0           | -6.734433               | 4.788196  | 0.301676  |
| 65            | 6             | 0           | -6.588901               | 4.195291  | 1.495786  |
| 66            | 6             | 0           | -6.069425               | 2.969516  | 1.324106  |

|     |   |   |            |           |           |
|-----|---|---|------------|-----------|-----------|
| 67  | 6 | 0 | -6.359244  | 4.332084  | -1.949704 |
| 68  | 6 | 0 | -6.829290  | 5.549447  | -2.278425 |
| 69  | 6 | 0 | -7.252513  | 6.370274  | -1.298029 |
| 70  | 6 | 0 | -7.209466  | 6.002309  | -0.006605 |
| 71  | 6 | 0 | -6.877036  | 4.647455  | 2.723532  |
| 72  | 6 | 0 | -6.635898  | 3.850452  | 3.777472  |
| 73  | 6 | 0 | -6.113993  | 2.618684  | 3.624198  |
| 74  | 6 | 0 | -5.831635  | 2.181636  | 2.383256  |
| 75  | 6 | 0 | -6.891178  | 5.975843  | -3.726462 |
| 76  | 6 | 0 | -5.859002  | 1.750624  | 4.834097  |
| 77  | 1 | 0 | 7.590970   | 1.119141  | 0.402406  |
| 78  | 1 | 0 | 10.385847  | 5.325574  | 0.031981  |
| 79  | 1 | 0 | 9.879144   | 7.697945  | -0.329098 |
| 80  | 1 | 0 | 7.579802   | 8.449251  | -0.596380 |
| 81  | 1 | 0 | 5.723400   | 6.857939  | -0.508806 |
| 82  | 1 | 0 | 6.971307   | -1.271475 | -1.689639 |
| 83  | 1 | 0 | 7.501069   | -1.220782 | -0.054934 |
| 84  | 1 | 0 | 3.656161   | -2.813693 | -0.155998 |
| 85  | 1 | 0 | 3.980445   | -2.500370 | 1.614232  |
| 86  | 1 | 0 | 7.525728   | -6.763420 | 0.051075  |
| 87  | 1 | 0 | 7.601912   | -7.091815 | 2.456442  |
| 88  | 1 | 0 | 5.987829   | -3.221676 | 3.072956  |
| 89  | 1 | 0 | 5.407097   | -1.495610 | -2.188162 |
| 90  | 1 | 0 | 6.853623   | -4.883376 | -4.280189 |
| 91  | 1 | 0 | 7.275092   | -6.027202 | -2.186154 |
| 92  | 1 | 0 | 6.236268   | -6.299333 | 4.672762  |
| 93  | 1 | 0 | 7.911830   | -5.621496 | 4.712439  |
| 94  | 1 | 0 | 6.496761   | -4.550649 | 4.984604  |
| 95  | 1 | 0 | 6.388757   | -1.437093 | -4.685095 |
| 96  | 1 | 0 | 6.165303   | -2.994968 | -5.547073 |
| 97  | 1 | 0 | 4.752869   | -2.201145 | -4.770267 |
| 98  | 1 | 0 | 1.506486   | 2.208956  | -0.088753 |
| 99  | 1 | 0 | -1.506512  | -2.154648 | 0.076690  |
| 100 | 1 | 0 | -7.575917  | -1.062233 | -0.617488 |
| 101 | 1 | 0 | -10.350361 | -5.293859 | -0.774869 |
| 102 | 1 | 0 | -9.838746  | -7.689177 | -0.646471 |
| 103 | 1 | 0 | -7.544683  | -8.455772 | -0.377825 |
| 104 | 1 | 0 | -5.698653  | -6.856782 | -0.228600 |
| 105 | 1 | 0 | -7.523222  | 1.220343  | 0.061456  |
| 106 | 1 | 0 | -6.926783  | 1.465518  | -1.646111 |
| 107 | 1 | 0 | -4.006311  | 2.671801  | -1.410887 |
| 108 | 1 | 0 | -3.662982  | 2.821321  | 0.378597  |
| 109 | 1 | 0 | -6.009145  | 3.639719  | -2.731175 |
| 110 | 1 | 0 | -7.642233  | 7.369908  | -1.553055 |
| 111 | 1 | 0 | -7.560776  | 6.695332  | 0.774106  |
| 112 | 1 | 0 | -7.303568  | 5.650713  | 2.880102  |
| 113 | 1 | 0 | -6.870865  | 4.216083  | 4.791123  |
| 114 | 1 | 0 | -5.404978  | 1.178430  | 2.232524  |
| 115 | 1 | 0 | -5.902047  | 6.377318  | -4.044298 |
| 116 | 1 | 0 | -7.152252  | 5.121260  | -4.390713 |
| 117 | 1 | 0 | -7.657246  | 6.764905  | -3.898630 |
| 118 | 1 | 0 | -6.784229  | 1.652828  | 5.446472  |
| 119 | 1 | 0 | -5.532635  | 0.721989  | 4.562546  |
| 120 | 1 | 0 | -5.061836  | 2.201922  | 5.467735  |

### Optimized structure of TT-T-ID

| Center Number | Atomic Number | Atomic Type | Coordinates (Angstroms) |           |           |
|---------------|---------------|-------------|-------------------------|-----------|-----------|
|               |               |             | X                       | Y         | Z         |
| 1             | 6             | 0           | -1.892473               | 0.894382  | 0.040122  |
| 2             | 6             | 0           | -3.124931               | 1.446452  | 0.036043  |
| 3             | 6             | 0           | -3.434511               | 2.750930  | 0.041138  |
| 4             | 16            | 0           | -4.368799               | 0.666884  | 0.025199  |
| 5             | 6             | 0           | -5.381074               | 1.724337  | 0.020711  |
| 6             | 6             | 0           | -4.761873               | 2.920649  | 0.033404  |
| 7             | 6             | 0           | -6.721321               | 1.577790  | 0.006172  |
| 8             | 6             | 0           | -7.597295               | 0.547197  | -0.012510 |
| 9             | 6             | 0           | -8.944577               | 0.800997  | -0.022691 |
| 10            | 6             | 0           | -9.546603               | -0.410023 | -0.041689 |

|    |    |   |            |           |           |
|----|----|---|------------|-----------|-----------|
| 11 | 6  | 0 | -8.615989  | -1.362850 | -0.043143 |
| 12 | 6  | 0 | -7.379471  | -0.805026 | -0.025184 |
| 13 | 6  | 0 | -10.854552 | -0.696433 | -0.057676 |
| 14 | 6  | 0 | -11.199517 | -1.996039 | -0.075520 |
| 15 | 6  | 0 | -10.262267 | -2.962254 | -0.077218 |
| 16 | 6  | 0 | -8.951725  | -2.660045 | -0.060928 |
| 17 | 8  | 0 | -9.525561  | 1.866007  | -0.016710 |
| 18 | 6  | 0 | 7.379250   | 0.805177  | -0.024875 |
| 19 | 6  | 0 | -5.410341  | 4.280893  | 0.036212  |
| 20 | 16 | 0 | -0.651541  | 1.707148  | 0.045221  |
| 21 | 6  | 0 | 0.293762   | 0.595953  | 0.043692  |
| 22 | 6  | 0 | -0.293592  | -0.596411 | 0.043067  |
| 23 | 6  | 0 | -1.616464  | -0.428201 | 0.040096  |
| 24 | 6  | 0 | 1.616539   | 0.427822  | 0.041193  |
| 25 | 6  | 0 | 1.892656   | -0.894726 | 0.040302  |
| 26 | 16 | 0 | 0.651646   | -1.707612 | 0.044168  |
| 27 | 6  | 0 | 3.125079   | -1.446746 | 0.036418  |
| 28 | 6  | 0 | 3.434730   | -2.751233 | 0.040542  |
| 29 | 16 | 0 | 4.368835   | -0.667112 | 0.026862  |
| 30 | 6  | 0 | 5.381335   | -1.724500 | 0.021500  |
| 31 | 6  | 0 | 4.762149   | -2.920886 | 0.033151  |
| 32 | 6  | 0 | 6.721495   | -1.577783 | 0.007106  |
| 33 | 6  | 0 | 7.597250   | -0.547066 | -0.011794 |
| 34 | 6  | 0 | 8.944575   | -0.800652 | -0.021895 |
| 35 | 6  | 0 | 9.546472   | 0.410466  | -0.041579 |
| 36 | 6  | 0 | 8.615692   | 1.363118  | -0.043325 |
| 37 | 8  | 0 | 6.372637   | 1.478755  | -0.023455 |
| 38 | 6  | 0 | 10.854434  | 0.697007  | -0.057823 |
| 39 | 6  | 0 | 11.199128  | 1.996673  | -0.076483 |
| 40 | 6  | 0 | 10.261703  | 2.962725  | -0.078494 |
| 41 | 6  | 0 | 8.951282   | 2.660388  | -0.061888 |
| 42 | 8  | 0 | 9.525773   | -1.865593 | -0.015558 |
| 43 | 8  | 0 | -6.372882  | -1.478746 | -0.023351 |
| 44 | 6  | 0 | 5.410675   | -4.280991 | 0.034406  |
| 45 | 1  | 0 | -2.722520  | 3.588150  | 0.050129  |
| 46 | 1  | 0 | -7.226555  | 2.559732  | 0.009393  |
| 47 | 1  | 0 | -11.622828 | 0.092751  | -0.056549 |
| 48 | 1  | 0 | -12.267256 | -2.273205 | -0.089211 |
| 49 | 1  | 0 | -10.573391 | -4.020656 | -0.092254 |
| 50 | 1  | 0 | -8.192975  | -3.458412 | -0.062660 |
| 51 | 1  | 0 | -6.047265  | 4.413136  | 0.940049  |
| 52 | 1  | 0 | -4.654417  | 5.097757  | 0.048751  |
| 53 | 1  | 0 | -6.030772  | 4.425100  | -0.877109 |
| 54 | 1  | 0 | -2.337910  | -1.257498 | 0.037481  |
| 55 | 1  | 0 | 2.337962   | 1.257149  | 0.039571  |
| 56 | 1  | 0 | 2.722894   | -3.588530 | 0.048439  |
| 57 | 1  | 0 | 7.226808   | -2.559699 | 0.010261  |
| 58 | 1  | 0 | 11.622844  | -0.092088 | -0.056360 |
| 59 | 1  | 0 | 12.266852  | 2.273959  | -0.090491 |
| 60 | 1  | 0 | 10.572739  | 4.021211  | -0.094314 |
| 61 | 1  | 0 | 8.192426   | 3.458635  | -0.063923 |
| 62 | 1  | 0 | 6.047394   | -4.414364 | 0.938214  |
| 63 | 1  | 0 | 4.654863   | -5.097966 | 0.045620  |
| 64 | 1  | 0 | 6.031334   | -4.424044 | -0.879007 |

---
